# Supplementary material
Source: MDPI journal article supplement (https://www.mdpi.com/2079-9276/12/2/28)
Supplement: s1 [file s1 › resources-2137105-supplementary.pdf]

Article

# A Tailing Dump as Industrial Deposit. ; Study of the Mineralogical Composition of Tailing Dump of the Southern Urals and the Possibility of Tailings Re-Development

Elena N. Shaforostova, Olga V. Kosareva-Volod'ko, Olga V. Belyankina, Danila Y. Solovykh, Ekaterina S. Sazankova, Elena I. Sizova and Danila A. Adigamov

## Supplementary Materials

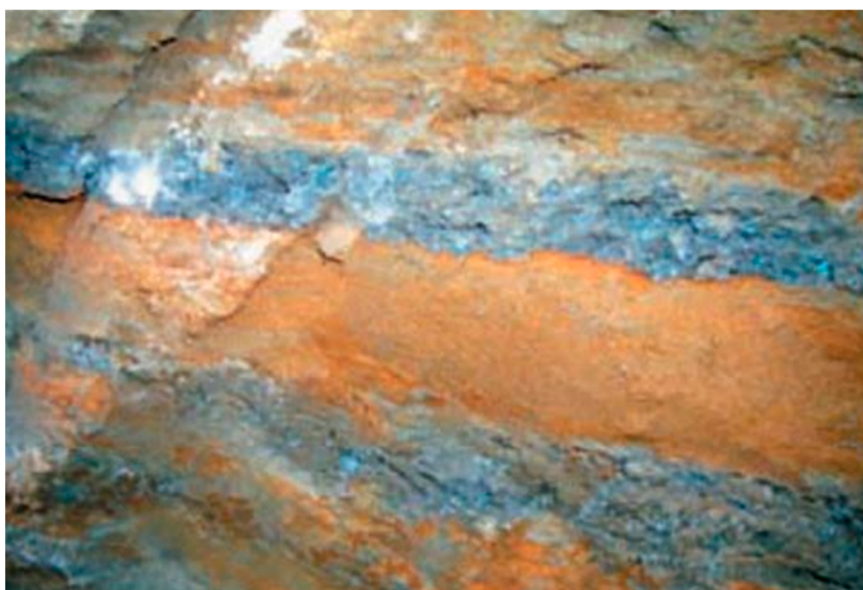

**Figure S1.** Horizontal bedding (tailings dump of the Buribaevskiy Ore-Processing Plant).

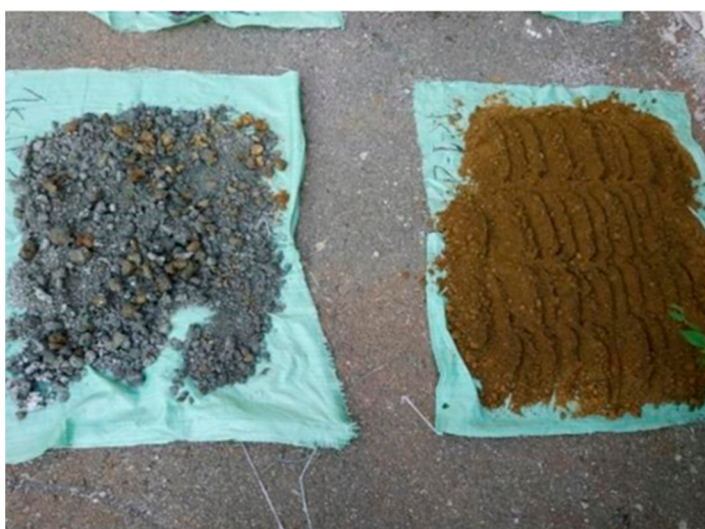

**Figure S2.** Identified two separate fractions with different content of non-ferrous and noble metals (old tailings of the Sibayskiy Ore-Processing Plant).

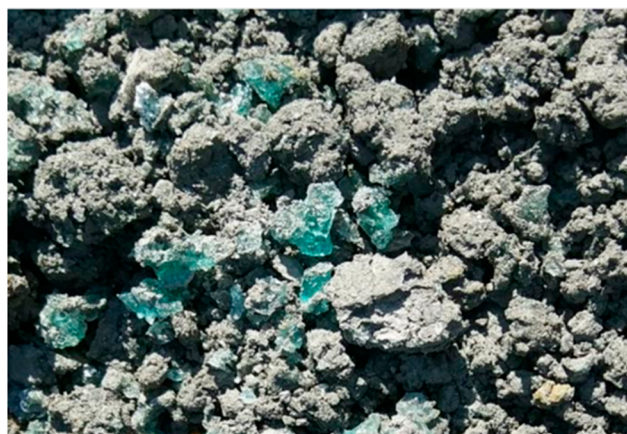

**Figure S3.** Sulfates of the Gaiskiy tailing dump from pit № 2.

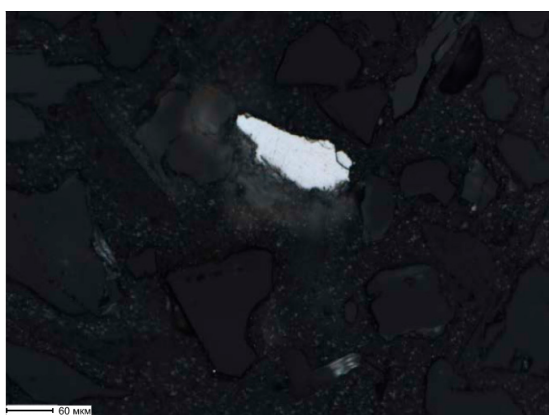

**(a)**

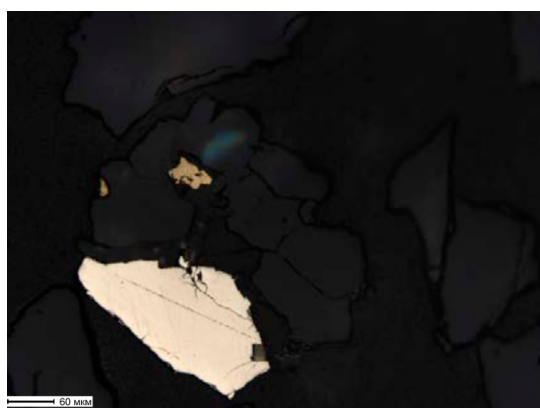

**(b)**

**Figure S4.** Ore minerals in tailings samples of the Gaiskiy processing plant ( $-1 + 0.25$ ): **(a)** Arsenopyrite grains in mass; **(b)** Pyrite with small drop-shaped inclusions and xenomorphic chalcopyrite grains.
